# Supplementary material for: An actionable definition and criteria for “sustainable chemistry” based on literature review and a global multisectoral stakeholder working group
Source: Royal Society of Chemistry journal article supplement (doi:10.1039/d3su00217a), 2023-01-01
Supplement: d3su00217a3.xlsx [file d3su00217a3.xlsx]

## Sheet: Full List of 45 Sources
Author/Entity	Sector Type (NGO, Govt, Inter-Govt, Academia, Society, Trade Org, etc.)	Type of Material	Name of Material	Year	URL Link	Term(s) of Focus ("sustainable chemistry", "sustainable chemicals", "safe by design", "safe and sustainable by design (SSbD)", etc.)	Summary	Principles	Definition/Definition Elements	Implementing Criteria	Other Useful Notes
ACS Green Chemistry Institute	NGO	Booklet	Design Principles for Sustainable Green Chemistry & Engineering	2015	https://www.acs.org/content/dam/acsorg/greenchemistry/resources/2015-gci-design-principles.pdf	sustainable green chemistry and engineering	"An attempt to organize various principles of green chemistry and engineering and present them in a way that helps people to make their chemistry and engineering “greener” and more sustainable."	Overall principles: -Maximize resource efficiency -Eliminate and minimize hazards and pollution -Design systems holistically and using lifecycle thinking Within each of these 3 overarching principles are sub-principles gathered from (all reviewed in this matrix): -Anastas and Warner, 12 green chem principles (1998) -Anastas and Zimmerman, 12 green eng principles (2003) -Abraham and Nguyen, green …	N/A	N/A	N/A
Anastas and Zimmerman	Academia	Article	The periodic table of the elements of green and sustainable chemistry	2019	https://pubs.rsc.org/en/content/articlelanding/2019/gc/c9gc01293a/unauth	green and sustainable chemistry	Presents "elements" of green and sustainable chemistry, "presented to emphasize core humanitarian aims and principles. The reviews additional elements as grouped by the principles of green chemistry and engineering. Includes a section on "enabling systems"	A. Humanitarian 1. Appropriate techologies for the developing world. 2. Chemistry for Wellness 3. Acess to safe and reliable water 4.Chemistry for benign food production and nutrition. 5. Ensure environmental justice, security and equitable opportunities 6. Chemistry to preserve natural carbon and other biochemical cycles 7. No chemicals of war or oppression 8. Design to avoid dependency [addicti…	Called "elements" in the paper....at the level of principles rather than offering a succinct definition	Implementing Metrics: Atom economy: how much of the reactant atoms actually form the final product) - % atom economy = molar mass of product/molar mass of all reactants*100 E factor: the amount of waste producted in the manufacture of a chemical product E factor - kg waste/kg product F Factor: quanitfies the desired to get maximum function with the minimal amount of chemical used Chemical body bu…	N/A
Blum et al.	Academia	Article	The concept of sustainable chemistry: Key drivers for the transition towards sustainable development	2017	https://www.sciencedirect.com/science/article/abs/pii/S2352554117300037	sustainable chemistry	This article aims at stimulating this transition process towards a sustainable chemical sector by proposing “100 words for sustainable chemistry”, objectives and guiding principles as well as actions steps towards the further implementation of sustainable chemistry.	Seven Objective and Guiding Principles of Sustainable Chemistry: 1. Design and use benign chemicals 2. Develpent and use of alternative solutions for problematic application 3. Reduction of impacts 4. Conservation of Natural resources 5. Promotion of resue and recycling 6. Increase of market opportunities 7. Application of corporate social responsibility	Sustainable chemistry in 100 words: Sustainable chemiistry contributes to postitive, long-term sustainable development. With new approaches, technologies and structures, sustainable chemistry stimulates social innovations and develops value-creating products and services. Sustainable chemistry uses approaches, substances, materials and processes with the least adverst effects. Therefore, sustaina…	Essentials of Sustainable Chemistry (below their definition in Fig. 1): -Long-term postiive development -Use substitutes, alternatives, and recycling concepts -Avoid damage and adverse effects -Holistic approach -Research and education for sustainable development -Substances and processes with the least possible adverse effect -Measurable objectives -Green chemistry -Sound management of chemicals…	Refers to a 2014 defiinition of Sustainable Chemistry by the OECD: Is a chemistry characterized by increased resource efficiency, safer and less polluting substances, through innovations beyond sector borders, improved performance and increased added value. Differentiates from green chemistry..."This holistic approach distinguishes from green chemistry and from operational safe use of chemicals. …
CEFIC	Industry	Input Paper	Input Paper on the Chemicals Strategy for Sustainability	2020	https://cefic.org/app/uploads/2020/09/Cefic-Input-Paper-Chemical-Strategy-for-Sustainability-CSS.pdf	Safe and sustainable by design	Responds to the chemical strategy for sustainability and includes a section outlining CEFIC's position on: ENABLE THE TRANSITION TO A SUSTAINABLE EUROPE: move from hazard-based substitution to sustainable-by-design assessment	No principles noted as explicit principles, but rather needs or measures to advance... 1. Expand from a hazard-driven substitution to safe and sustainable-by-design, i.e. a ‘holistic substitution’ that encompasses safety, different sustainability impacts and value chain drivers. - This approach requires a widely accepted framework defining ‘sustainable-by-design’principles and a reference product…	N/A	N/A	N/A
CEFIC	Industry	Position Paper	Safe and Sustainable by Design: Boosting Innovation and Growth Within the European Chemical Industry	2021	https://cefic.org/a-solution-provider-for-sustainability/safe-and-sustainable-by-design/	SSbD		1. There cannot be a compromise on chemical safety, for humans and the environment. And compliance with existing regulations is a must. 2. SSbD is an iterative process guiding innovation towards new chemistries and processes, replacing the existing portfolio by ever more sustainable and broadly affordable solutions. SSbD has the potential to accelerate innovation towards climate neutrality, circu…	The chemical industry defines Safe and Sustainable-by-Design as a process to innovate and put on the market chemicals, materials, products and technologies that are safe and deliver environmental, societal, and/or economical value through their applications. Those chemicals, materials, products and technologies enable accelerating the transition towards a circular economy and climate-neutral soci…	Outlines the use of both safety and sustainability dimensions. Suggests mapping existing criteria as a first step, including those already used in the current regulatory context and on sustainability-related performance. Elevates the use of portfolio sustainability assessment methods.	N/A
CEFIC	Industry	Guidance Document	Safe and Sustainable by Design: A Transformative Power	2022	https://cefic.org/app/uploads/2022/04/Safe-and-Sustainable-by-Design-Guidance-A-transformative-power.pdf	SSbD	"This guidance considers which safety and sustainability aspects are recommended to be part and parcel of the innovation process, to ensure chemicals, materials, products, processes, and services are Safe and Sustainable-by-Design. The guidance focuses on dimensions and considerations for safety and sustainability, that need to be integrated into an innovation process, with the aim to reach the a…	The "basic principle when innovating to improve the functionality and performance of chemicals, materials, products, processes or services, is the aim to significantly improve performance in at least one of the dimensions of safety and sustainability without significant negative impacts4 in any of the other dimensions, compared to the incumbent solutions. As a minimum, a sound implementation of “…	See previous entry	See document for their workflow and process for thinking through "safe" and "sustainable"	See Annex 1 for definitions of SSbD, product, substance, mixture, chemical, and material.
Centi and Perathoner	Academia	Book Chapter	From Green to Sustainable Industrial Chemistry	2009	https://application.wiley-vch.de/books/sample/3527315527_c01.pdf	sustainable chemistry	Reviews and distingushes the definitions of green chemistry and sustainable chemistry	References the 12 green chemistry principles	associated with maintenance and continuation of an ecological-sound development. chemistry as part of an integrated vision where chemistry, sustainability and innovation are three key components for the future of our society.	N/A	"Sustainable chemistry is the maintenance and continuation of an ecological-sound development, whereas green chemistry focuses on the design, manufacture, and use of chemicals and chemical processes that have little or no pollution potential or environmental risk and are both economically and technologically feasible. In Europe, apart from in the UK, the term sustainable chemistry is now preferre…
ChemSec	NGO	Position Paper	SSbD Chemicals	2021	https://chemsec.org/app/uploads/2021/06/ChemSec-Safe-and-Sustainable-by-Design-Chemicals-2021-06-29.pdf	SSbD	"In the process of creating safe and sustainability criteria for chemicals ChemSec is here presenting its views on how the Commission should proceed and how the safe and sustainable by design criteria could support reaching the goals of the Chemical Strategy for Sustainability. In order to make it comprehensible, the safe and sustainable by design criteriais dividedinto two types of parameters: s…	N/A	N/A	Products can not be considered safe if they have the following hazard properties: -Carcinogens -Mutagens and Reproductive toxicants, Categories 1a, 1b and 2 -PBTs, vPvBs -PMTs, vPvMs -Endocrine Disrupting Chemicals -Respiratory sensitizers, Category1 -Skin sensitizers, Category 1 -Specific Organ Toxicity, Categories 1, 2 (repeated exposure and single exposure) and 3 (single exposure) -Acute Healt…	This document also provides a few decision-making charts
Dow Chemical	Industry	White Paper	Sustainable Chemistry: The Sustainable Chemistry Index	2015	http://storage.dow.com.edgesuite.net/dow.com/sustainability/goals/50409-SustainableChemistry-WPaper-Digital.pdf	sustainable chemistry	N/A	N/A	Paraphrased by UBA: “Green chemistry is a set of principles to design, but sustainable chemistry looks beyond only a science. It is a catalyst for change, an innovative approach to problem-solving and a long-term solution to global sustainability challenges. ... Ultimately, chemistry and collaboration – and people – have the power to bend that straight line to a more positive point in the future,…	The Sustainable Chemistry Index (SCI) that Dow developed comprises 8 categories, and is a semi-quantitative analysis. It's an index that rates the entire company's product portfolio (not sure what the ideal index is, but it has been slowly increasing over the years). The categories are: -Renewable or Recycled Content -Resource Management -Manufacturing Efficiency -Environmental Life Cycle Benefit…	Life cycle analysis is checked over by an external third party, but this is always a bit of a concern with industry. Ensuring there is appropriate oversight and no "greenwashing" (in this case "sustainability washing"). Also see 2017 Helling et al. article "Use of the Dow Sustainable Chemistry Index To Grow Life Cycle Thinking and Business Engagement" which is a follow-up to this 2015 update
Eckelman et al.	Academia/Industry	Article	Applying green chemistry to raw material selection and product formulation at The Estée Lauder Companies	2021		green chemistry	"Here, we report the development of a quantitative green chemistry scoring methodology incorporating human health (HH), ecosystem health (ECO), and environmental (ENV) endpoints to specifically characterize cosmetic and personal care products. Using a hazard-based approach, a “Green Score” for cosmetic ingredients was calculated incorporating the HH, ECO, and ENV categories. Ingredient and chemic…			"There are 8 individual metrics: 3 each for HH (acute, ocular, and dermal toxicity) and ECO (bioaccumulation, persistence, and aquatic toxicity) and 2 for ENV (feedstock sourcing and greenhouse gas emissions). All metrics and data quality measures can be examined by formulators for individual endpoints, averaged by category, or further averaged to an overall Green Score."	Includes Anastas and Zimmerman as co-authors.
EEA	Inter-Govt	Briefing	Designing safe and sustainable products requires a new approach for chemicals	2021	https://www.eea.europa.eu/themes/human/chemicals/delivering-products-that-are-safe	SSbD	"This briefing describes approaches that are safe and sustainable by design and identifies enabling conditions, which support their uptake, and the related challenges and opportunities"	Enabling conditions: -Harmonised methodologies and minimum performance requirements against safetyand sustainability goals -Education and training -Available finance -Research and innovation -Coherent and ambitious chemicals legislation	"Safe and sustainable by design is a pre-market design approach whereby the objectives of minimising the use of hazardous chemicals, reducing greenhouse gas emissions, and fostering the reuse and recycling of materials in a circular economy are built into product design."	Step 1. Identifying options for product delivery Step 2. Mapping the potential impacts of product options throughout the life cycle -Chemical safety -Resource use and circularity -Greenhouse gas emissions -Impacts on ecosystems Step 3. Assess sustainability performance throughout the product's life cycle Step 4. Selecting the most sustainable product option: scoring and minimum performance criter…	Notes goals of the European Green Deal to: -Protect citizens against hazardous chemicals -Transition to a carbon-neutral economy by 2050 -Deliver a circular economy -Protect nature and reverse the degradation of ecosystems
EU Commission	Inter-Govt	Report	Key issues in chemicals policy on the road to a non-toxic environment	2014		chemical management policies, EU, REACH, non-toxic environment, recommendations, Environment Action Program (EAP)	This does not relate to sustainable chemistry principles or definitions, but instead is a series of recommended policy issues (brought forward by a delegation of EU member state governing bodies - the 7th Environment Action Program), discussed at a meeting in December 2014 and to be brought forward to the EU Commission. The recommendations regard improved criteria around the hazards and definitio…	N/A	N/A	Recommendations were made to the EU Commission about priority areas, including what criteria still need to be established and the timeline for this.	The following sentence does not make sense from a chemicals perspective, unless by "non-chemical solutions" they mean economic, policy or managerial solutions (such as chemical leasing), which I think is what they're implying: "the 7th EAP calls on the Commission to develop, by 2018, a Union strategy for a non-toxic environment that is conducive to innovation and the development of sustainable su…
EU Commission	Inter-Govt	Report	Study for the strategy for a non-toxic environment of the 7th Environment Action Programme	2017	https://ec.europa.eu/environment/chemicals/non-toxic/pdf/NTE%20main%20report%20final.pdf	Non-toxic environment, sustainable substitutes, chemical hazards, risk, persistence	This is a study commissioned by the EU and the 7th Environment Action Program (EAP) to help inform the development of a EU-wide "strategy for a non-toxic environment", which includes exploring the innovation and development of "sustainable substitutes including non-chemical solutions". The study provides an overview of the current state of play (in 2017) and gaps and deficits in EU policy and leg…	N/A	The term "sustainable substance" comes up many times in the document, but is never really defined. In searching through the document for the term "sustainable", the following was found on p.49: "No national programmes that focus on the use of new, non-toxic substances could be identified during the project research. However, a number of activities on green chemistry, which are interrelated and co…	On p.87, a summary of the feedback from the June 2016 workshop participants on the criteria defining sustainable substitutions is provided. The definition was felt to be mainly political in nature, and in particular in how decisions are made to weigh hazard, risk, and socioeconomic arguments. A need for a definition of "non-toxic" is also required, and would help build out the strategy. Reconcili…	N/A
EU Commission	Inter-Govt	Report	Chemicals Strategy for Sustainability	2020	https://echa.europa.eu/hot-topics/chemicals-strategy-for-sustainability	impact assessment, chemicals management, chemical hazards, environmental and human health risk	This strategy is the latest document compiled by the European Commission that highlights action towards a toxic-free environment. The strategy "strives for a toxic-free environment, where chemicals are produced and used in a way that maximises their contribution to society including achieving the green and digital transition, while avoiding harm to the planet and to current and future generations…	N/A	In the first section on promoting safe and sustainable-by-design chemicals, the commission highlights its desire to create a set of criteria for the EU on what safe and sustainable-by-design chemicals are. Other aspects include: -Establishing an SSbD network for information sharing -Using financial support to ensure the uptake and commercialization/deployment of SSbD chemicals -Ensure SSbD skills…	To be determined and developed (likely part of the SSbD strategy).	Their timeline is to get a draft definition out in Feb 2022 and to finalize in May 2022 for SSbD
EU Commission	Inter-Govt	Presentation	Life Cycle Assessment approach being taken to ensure that chemicals are designed for sustainability (Carla Caldeira)	2021	https://www.researchgate.net/publication/351283498_Life_Cycle_Assessment_approach_being_taken_to_ensure_that_chemicals_are_designed_for_sustainability	presentation, SSbD development framework, SBD principles, life cycle assessment, life cycle thinking, risk assessment	Presentation given at the 31st SETAC Europe annual meeting, describing progress in the SSbD framework development and the importance of life cycle thinking and LCA and the intersection with risk assessment to create safe and sustainable by design (SSbD) chemicals and products.	The SSbD underpinning principles are as follows: -green chemistry and engineering -life cycle assessment -UN SDGs -safe by design -risk assessment There are also three areas of focus in SBD: 1. human health, safety, environment 2. durable, reusable, recyclable, circular, resource efficient 3. advanced properties, functional, efficient design process These broadly cross with societal empowerment, …	SSbD is defined as "an approach to the design, development and use of substances, materials and/or products that focuses on providing a function (or service), while reducing harmful impacts to human health and the environment along life cycle stages.	Still being developed as part of a consultation process with stakeholders (through a questionnaire, focus groups, etc.)	Contains info about the SSbD and in particular the framework for it and some principles and thematics.
European Chemical Society (EuChemS)	Umbrella Org	Webpage	(EuChemS Policy Positions)	2021	https://www.euchems.eu/policy-and-communication/policy-positions/	European Chemical Society, European Association for Chemical and Molecular Sciences, policy responses, policy positions, white papers	This is the website of the European Chemical Society. It highlights the society's responses to EU legislation, large-scale challenges (such as water security, climate change, etc.), public and open consultations, and more. However, there is nothing specific to sustainable or green chemistry on the site (even though the terms are mentioned here and there). The closest thing is a response to discus…	N/A (they have been developed and should be somehwere, but can't be found)	N/A	N/A	"Sustainable chemistry is concerned with the development of environmentally benign chemical reactions and products. It produces more efficient chemical processes, technologies and product designs that conserve resources, generate less waste and less hazardous emissions and deliver a sustainable, cleaner and healthier environment."
Government Accountability Office (GAO)	Govt	Report	Chemical Innovation Technologies to Make Processes and Products More Sustainable	2018	https://www.gao.gov/assets/gao-18-307.pdf	sustainable chemistry	"GAO was asked to conduct a technology assessment to explore, among other things, the opportunities, challenges, and federal roles in sustainable chemistry. This report discusses (1) how stakeholders define and assess sustainable chemistry; (2) available or developing technologies to make chemical processes and products more sustainable; and (3) how the federal government, industry and others con…	"Stakeholders lack agreement on how to define sustainable chemistry and how to measure or assess the sustainability of chemical processes and products; these differences hinder the development and adoption of more sustainable chemistry technologies. However, based on a review of the literature and stakeholder interviews, GAO identified several common themes underlying what sustainable chemistry s…	"Stakeholders do not agree on a single definition of sustainable chemistry, but there are some common understandings of what this term means. In total, we asked 71 representatives of stakeholder organizations how they or their organization define sustainable chemistry. The most common response we received, with 28 respondents agreeing, was that sustainable chemistry includes minimizing the use of…	"Stakeholders such as chemical companies, federal agencies, and others use many different approaches for assessing the sustainability of chemical processes and products. For example, some chemical companies have designed their own systems for assessing sustainability, while others use a common approach considered appropriate by their industry sector. While the varying approaches provide flexibili…	See Smith et al. which reviews the survey results.
GC3	Industry	Report	An Agenda to Mainstream Green Chemistry	2015	https://greenchemistryandcommerce.org/documents/An_Agenda_to_Mainstream_Green_Chemistry.pdf	green chemistry, mainstreaming, strategy, business and industry	This is a strategy document written by the Green Chemistry and Commerce Council (GC3) to help mainstream innovation in and adoption of green chemistry, particularly in industry. Green chemistry is the primary focus and is defined explicitly. Sustainability and sustainable chemistry is mentioned but only indirectly and is not explicitly defined. Five particular strategies are outlined as critical …	N/A	N/A	N/A	N/A
GC3	Industry	Statement	Joint statement on using green chemistry and safer alternatives to advance sustainable products	2016	https://greenchemistryandcommerce.org/documents/RLC-JointStatement.pdf	green chemistry, safer alternatives, sustainable chemistry	"The companies involved in this dialogue support the overarching goal of exploring and, whenever possible, accelerating the development and use of more sustainable products through innovation in and sourcing of green chemistry solutions. Each of the companies involved is on its own journey and at different stages in its product sustainabilility program. All share a commitment to having an open di…	1) Goal setting and continuous improvement: Setting company-specific goals and monitoring progress accordingly 2) Communication: Communicating with stakeholders along the value chain about the demand for green chemistry solutions and the availability of new alternatives 3) Transparency: Sharing information on chemical hazards and risks to human health and the environment, while protecting confide…	References the OECD definition: "Sustainable chemistry is the design, manufacture and use of efficient, effective, safe and more environmen-tally benign chemical products and processes. Within the broad frame-work of sustainable development, government, academia and industry should strive to maximise resource efficiency through activities such as energy and non-renewable resource conservation, ri…	N/A	N/A
GC3	Industry	Webpage	GC3 Sustainable Chemistry Alliance	N.D.	https://gc3sca.com/	sustainable chemistry, alliance, companies, industry, innovation	Website for the GC3 SCA, a group of companies dedicated to sustainability in chemistry across the value and supply chains. The website includes a general definition for sustainable chemistry as well as broad strategies and focus areas. While there isn't much information on the site yet, the subpage "Our perspective" gives a good overview of sustainable chemistry, the sectors involved, the technic…	N/A	"Sustainable chemistry provides improvements on one or more attributes such as improved human or ecological health risks, enhanced energy efficiency, reduced environmental emissions or reduced waste generation while delivering the desired performance at competitive cost."	Although not explicitly stated or expanded on, the following criteria could be broadly stated as relevant to sustainable chemistry: -improved human or ecological health risks -enhanced energy efficiency -reduced environmental emissions or reduced waste generation AND simultaneously delivering the desired product/chemical performance at competitive cost.	Very minimal information available on the site.
Halpaap et al.	Inter-Govt	Article	Sustainable chemistry in the global chemicals and waste management agenda	2018	https://www.sciencedirect.com/science/article/pii/S2452223617300846?via%3Dihub	sustainable chemistry, non-toxic environment, UN Environment Assembly, Agenda 2030	This article summarizes recent work towards identifying common best practices in sustainable chemistry and creating a global definition, through efforts by the UN Environment Assembly. Currently there are focal areas but no single, global, well-defined definition. A report was set to be finalized in 2018 by the UNEA, with recommendations for sustainable chemistry and how it can help with chemical…	There are broad scope principles and ideas that have strong support for inclusion under sustainable chemistry, including: -understanding sustainability across the life cycle of a chemical product -advancing research and innovation -scaling up substitution of safer alternative chemicals -need to balance economic, social and environmental aspects throughout the life cycle of chemicals and waste At …	There are 3 potential "definitions" or frameworks for sustainable chemistry that have been discussed. Sustainable chemistry is either: (1) a new type of chemistry; (2) an assessment framework covering the environmental, economic and social dimensions of sustainable development; or (3) a global destination or vision to be achieved in the long-term. However, no formal definition currently exists. T…	From submissions of feedback from interested stakeholders to the UNEP as part of Resolution 2/7, the following themes were provided as a basis to help structure the submissions (these are not necessarily crtieria, but areas where criteria could be developed): -safe chemical alternatives -non-chemical alternatives -research and development -technology transfer -innovations in business models -econ…	N/A
Hill et al.	Academia	Article	Challenges for Chemical Education: Engaging with Green Chemistry and Environmental Sustainability	2013	http://www.theaic.org/pub_thechemist_journals/Vol-86-No-1/Vol-86-No1-Article-5.pdf	sustainable chemistry education, green chemistry, sustainability, sustainable natural resource management, chemical enterprise	"This paper explores how chemistry and the chemical enterprise are progressing towards a sustainable chemistry philosophy and practice and it also explores the role which sustainable chemistry and, in particular, sustainable chemistry education have in engaging with the wider philosophy of environmental sustainability."	-scope of paper is to identify challenges for chemical education in enabling transition of the chemical enterprise towards sustainability -because "sustainability" and "sustainable development" are complex, multi-dimensional concepts, then sustainable chemistry is by extension also multi-dimensional in character -inherently interdisciplinary and must embrace economics, accounting, humanities, soc…	-no exclusive, well-defined definition -provides a framework for the themes around sustainable chemistry -references Tundo re: difference between green chemistry and sustainable chemistry	-provides broad overview of existing literature on how chemistry education should be taught, based on other expert opinions	Quote: "However, although it appears that green chemistry and sustainable chemistry are synonymous terms, Tundo [7] has suggested that there is a subtle difference in that sustainable chemistry has chemical processing connotations involving more energy efficient, less polluting chemical manufacturing processes which may generate greater profit margins, whereas green chemistry is more focused on ‘…
Institute for Local Self Reliance (ILSR)	NGO	Webpage	(General Initiatives)	2021	https://ilsr.org/initiatives/	research, advocacy, policy, energy democracy, business initiatives, composting, waste-to-wealth, community support	The Institute for Local Self-Reliance (ILSR) is focused primarily on supporting economic growth and prosperity in the US by focusing on local priorities and diminishing corporate control. Their website (linked here) talks about their various programs, including a composting initiative and a "Waste to Wealth" program focused on creating a zero-waste economy, but nothing about sustainable chemistry…	N/A	N/A	N/A	N/A
Integrated Pollution Prevention and Control (IPPC)	Inter-Govt	Webpage	Council Directive 96/61/EC and 2008/1/EC	1996 and 2008	https://ec.europa.eu/environment/archives/air/stationary/ippc/summary.htm	pollution prevention	"the IPPC Directive is about minimising pollution from various industrial sources throughout the European Union"	Annex IV Considerations: -Use of low-waste technology; -Use of less hazardous substances; -Furthering of recovery and recycling of substances generated and used in the process and of waste, where appropriate; -Comparable processes, facilities or methods of operation which have been tried with success on an industrial scale; -Technological advances and changes in scientific knowledge and understan…	N/A	N/A	N/A
ISC3	NGO	Dialogue Paper	Key Characteristics of Sustainable Chemistry	2021	https://www.isc3.org/fileadmin/user_upload/Documentations_Report_PDFs/ISC3_Sustainable_Chemistry_key_characteristics_20210113.pdf	sustainable chemistry	An overview of the key concepts of sustainable chemistry from the ISC3's perspective.	Key characteristics of Sustainable Chemistry: 1) Holistic, 2) Precautionary, 3) Systems Thinking, 4) Ethical and Social Responsibility, 5) Collaboration & Transparency, 6) Sustainable Innovation, 7) Sound Chemicals Management, 8) Circularity, 9) Green Chemistry, 10) Life cycle	"Sustainable chemistry is a framework giving guidance on how chemistry as a scientific and economic asset spanning multiple supply chains and consequently the whole life cycle can comply with the principles of sustainability for the betterment of our planet."	N/A	From the paper - "“Sustainable chemistry is achieved, if chemistry contributes in a sustainable manner to sustainability”. In other words, the principles of sustainability are applied to and implemented into the chemical sector (chemical industries and downstream users of their products). In this understanding sustainable chemistry is a guiding principle to align the practice of chemistry with su…
Kummerer and Clark	Academia	Book Chapter	Green and Sustainable Chemistry	2016	https://link.springer.com/chapter/10.1007/978-94-017-7242-6_4	green and sustainable chemistry	A book chapter that overviews the green and sustainable chemistry fields, offers a definition of suschem, and explains how it is different than green chem. Later in the chapter covers other related topics but that aren't directly relevant to this project.	Cites the 1996 IPPC Annex IV Principles	"Sustainable chemistry includes economical, social and other aspects related to manufacturing and application of chemicals and products. It aims not only at green synthesis or manufacturing of chemical products but also includes the contribution of such products to sustainability itself." "In general, only rarely are aspects that go beyond the chemicals themselves and their technical issues addre…	"Of course, the ultimate metric is life cycle assessment (LCA), but this is a demanding exercise that requires a lot of input data, making it inappropriate for most decisions made in a process environment. However, some companies do include LCA impacts such as greenhouse gas production in their in-house assessment, for example, to rank solvents in terms of their greenness."	Figure 4.2 shows the relationship of sustainability, sustainable chemistry green engineering, green tech-nology, and green chemistry
Kummerer	Academia	Editorial	Sustainable Chemistry: A Future Guiding Principle	2017	https://onlinelibrary.wiley.com/doi/full/10.1002/anie.201709949	sustainable chemistry	A 2 page editorial on thoughts about sustainable chemistry but does not offer a clear defintion, criteria, or principles.	"Sustainable chemistry is simultaneously both a path and a goal. It is not a new subdiscipline of chemistry, but a guiding principle."	"Chemistry is sustainable if it contributes in a sustainable manner to sustainability. A more precise definition of sustainable chemistry is not possible." "Sustainable chemistry starts from the function and service that is needed in a specific context, for example, mobility or housing. It then uses the knowledge of all chemical subdisciplines along the entire lifecycles of chemical products, goe…	N/A	N/A
Marion et al.	Academia	Article	Sustainable chemistry: how to produce better and more from less?	2017		sustainable chemistry, sustainable development	A summary of thoughts on sustainable chemistry compiled from the International Symposium on Green Chemistry (ISGC) organized in 2013, 2015 and 2017. Includes a definition and criteria. Later sections dive extensively into materials, processes, and impact. "This critical review, co‐authored by researchers from public organizations and chemical companies (small, medium and large industrial groups) …	"The main issue of sustainable chemistry is to develop and implement competitive processes and products whatever the resource is initially of a fossil or a renewable origin. Two main approaches are envisaged; (1) optimising processes based on the use of fossil carbon associated with the recycling of resulting products (e.g. recycling polymers at the end of their lifecycle, use of fossil carbon‐fr…	"Sustainable chemistry can be defined as the development of an even safer and more environmentally‐friendly chemistry but one which also equally integrates the priorities of economic competitiveness and societal concerns. Sustainable chemistry is a complex equation which must ensure the longevity of the human, animal, and vegetable species whilst taking into consideration issues related to access…	Summarized criteria: -Recyclable -Safe -Progress -Profit -Innovative -Renewable -Progress -Source of Energy -Legislations -Low Impact	"Defining sustainable chemistry is, however, far to be an easy task because chemistry is a highly dynamic system. The sustainabilityof a value chain is for instance directly depending on the access to energy (and above all to its origin – coal, gas, biomass...) and on the supply of raw materials. In the current economic context, it could be not so easy to predict what will be the best source of e…
Moser et al.	Academia	Article	Chemical leasing in the context of sustainable chemistry	2015	https://pubmed.ncbi.nlm.nih.gov/25475620/	chemical leasing, sustainable chemistry	This paper provides an overview of chemical leasing, a methodological framework for assessing the sustainability of projects (including 26 subgoals), and also offers an approach for sustainable chemistry. "Key Concepts: For the purpose of this paper, i.e. to show that chemical leasing is a business model contributing to sustainable chemistry, it is necessary, on one side, to provide a definition …	"Key elements of successful Chemical Leasing business models are proper benefit sharing, high-quality standards and mutual trust between participating companies." "Typical chemical leasing, when the following aspects are fulfilled: -No change of ownership of the chemical (no purchase, the chemical remains property of the provider). -Change to use-related payment (dimension of allocation,e.g. Euro…	"Chemical Leasing is a service-oriented business model that shifts the focus from increasing sales volume of chemicals, toward a value-added approach. The producer mainly sells the functions performed by the chemical, and functional units are the main basis for payment. Within Chemical Leasing business models, the responsibility of the producer and service provider is extended and may include the…	The following five sustainability criteria help to establish a high standard for chemical leasing and play an important role for the efficient and effective functioning of the business model: a. Reduction of adverse impacts for environment, health, energy and resource consumption caused by chemicals and their application and production processes. b. Improved handling and storage of chemicals to p…	"In this context, we propose an approach for definition of sustainable chemistry as follows: sustainable chemistry is achieved by reaching four basic goals: Goal 1 - Optimisation of resource efficiency Goal 2 - Reduction of adverse effects on health andenvironment Goal 3 - Increase in economic value and optimisation ofchemicals management Goal 4 - Safeguarding of overall sustainability (economic,…
Netherlands Ministry of Infrastructure and Water Management	Govt	Brochure	Safe by Design	2019	https://www.safe-by-design-nl.nl/home+english/documents/about+safe-by-design+documents/safe-by-design+brochure+en/handlerdownloadfiles.ashx?idnv=1878841	safe-by-design, circular design	A brochure about the safe-by-design concept and how to apply it. It includes a SbD definition but it seems this is probably derived from elsewhere.	N/A	"Safe-by-Design means that the safety of substances, materials, products and processes for human health and the environment are already included in the design phase."	N/A	"Safe-by-Design is a precondition for the circular economy. A sustainable design is a safe design. Everywhere, now and in the future. The intended reuse of substances and materials makes Safe-by-Design an essential part of Circular Design."
OECD	Inter-Govt	Proceedings	Workshop on Sustainable Chemistry (Parts 1-3 on Teams)	1998	https://www.oecd.org/env/ehs/risk-management/reports-on-sustainable-chemistry.htm	sustainable chemistry	These documents provide an overview of the workshop held in Venice, Italy in October 1998, a first step " initiative to encourage fundamental breakthroughs in chemistry that would prevent pollution and, in most cases, improve performance and reduce costs." The workshop documents contain the presentations and poster material from all 75 experts that attended from 16 OECD member countries. An initi…	From EPA/Joe Carra (Co-Chair of Meeting)/OECD steering group on SC, stated as some but not all of sustainable chemistry "activities", presented in the survey intro to OECD members in prep of the meeting Pt3 Pg30: -Use of Alternative Feedstocks -Use of Innocuous Reagents -Employing Natural Processes -Use of Alternative Solvents -Design of Safer Chemicals -Developing Alternative Reaction Conditions…	"Workshop participants agreed that Sustainable Chemistry provides a cost-effective means of: -Reducing chemical threats to health and the environment -Accelerating the pace of chemical innovation; and thereby -Contributing to economic competitiveness and sustainable development." From EPA/Joe Carra (Co-Chair of Meeting)/OECD steering group on SC, presented in the survey intro to OECD members in p…	N/A	“Within the broad framework of Sustainable Development, we should strive to maximise resource efficiency through activities such as energy and non-renewable resource conservation, risk minimisation, pollution prevention, minimisation of waste at all stages of a product life cycle, and the development of products that are durable and can be re-used and recycled. Sustainable Chemistry strives to ac…
OECD	Inter-Govt	Brochure	Sustainable Chemistry	2004	https://www.oecd.org/env/ehs/risk-management/29361016.pdf	sustainable chemistry	Provides a principles, a definition, and criteria for sustainable chemistry. Also describes the roles of government, industry, academia, and NGOS.	"Technical areas of sustainable chemistry R&D include: -Use of alternative synthetic pathways -Use of alternative reaction conditions -Design of chemicals that are inherently safer than current materials -Use of renewable or recycled feedstocks -Avoidance of persistent, bioaccumulative, and toxic substances -Increased energy efficiency -Use of green analytical methods in processing"	"Sustainable chemistry is the design, manufacture and use of efficient, effective, safe and more environmentally benign chemical products and processes. Within the broad framework of sustainable development, government, academia and industry should strive to maximise resource efficiency through activities such as energy and non-renewable resource conservation, risk minimisation, pollution prevent…	"Criteria for assessing sustainable chemistry products and processes can include: -Impact on human health and the environment -Safety of workers and users throughout the product life cycle -Energy consumption and resource use -Economic viability of the new technology -Evaluation of the above factors at the local, country, regional, and global levels These basic criteria can serve as a foundation …	N/A
OECD	Inter-Govt	Report	Moving Towards a Safe(r) Innovation Approach (SIA) for More Sustainable Nanomaterials and Nano-enabled Products	2020		safe-by-design	Contains several working descriptions such as SbD, Regulatory Preparedness, the Safe(r) Innovation Approach (a combo of SbD and Regulatory Preparedness), and Trusted Environment and how they apply to the safer innovation of nanomaterials.	For SbD in nanotechnology, three pillars of design can be specified: 1. Safe(r)material/product: minimising, in the R&D phase, possible hazardous properties of the nanomaterial or nano-enabled product while maintaining function; 2. Safe(r)production: ensuring industrial safety during the production of nanomaterials and nano-enabled products, more specifically occupational, environmental and proce…	"The SbD (Safe-by-Design, Safer-by-Design, or Safety-by-Design) concept refers to identifying the risks and uncertainties concerning humans and the environment at an early phase of the innovation process so as to minimize uncertainties, potential hazard(s) and/or exposure. The SbD approach addresses the safety of the material/product and associated processes through the whole life cycle: from the…	Describes criteria related to nanomaterials but not for the concepts.	"Safety to human health and the environment is always relative rather than absolute. SbD strives for negligible human and environmental safety risks through an acceptable balance between safety, product functionality, and, as far as possible, costs, while meeting any applicable regulatory requirements for human and environmental safety and taking into account how the specific aspects of the innov…
OECD	Inter-Govt	Webpage	Sustainable Chemistry Definition	2021	https://www.oecd.org/chemicalsafety/risk-management/sustainablechemistry.htm	sustainable chemistry	A website with the definition of sustainable chemistry clearly displayed, with a few supporting statements and links to other relevant and supporting work by the OECD	Stated as "benefits": -Avoid PBTs -Use renewable resources -Minimize negative environmental impacts of chemical processing and manufacturing -Provide technologies that are economically competitive for and advantageous to industry	"Sustainable chemistry is a scientific concept that seeks to improve the efficiency with which natural resources are used to meet human needs for chemical products and services. Sustainable chemistry encompasses the design, manufacture and use of efficient, effective, safe and more environmentally benign chemical products and processes."	N/A	"Sustainable chemistry is also a process that stimulates innovation across all sectors to design and discover new chemicals, production processes, and product stewardship practices that will provide increased performance and increased value while meeting the goals of protecting and enhancing human health and the environment."
Roon et al.	Academia	Article	Sustainable chemistry: an analysis of the concept and its integration in education	2001	https://www.emerald.com/insight/content/doi/10.1108/14676370110388372/full/html	sustainable chemistry, green chemistry, chemistry education	"This article presents a general description of today's industry and identifies major problems. Based on this description and the objectives of sustainable development, some essential characteristics of sustainable chemistry were identified. There are many different ideas on how to make chemistry more environmentally benign. Sometimes these ideas resulted in concepts with names such as "green che…	-Equity between nations and generations -Shifting to renewable resources (both for the production of energy and materials), efficient use of biomass, optimize product design to reduce raw materials, energy use, and waste -Re-evaluate societal needs -Evaluate whether products fulfill elemental needs or marginal wants/desires (sustainable if there is resource and environmental capacity -Assess indu…	The concepts of sustainable chemistry are organized into levels: -Chemical (chemicals/reactions without questioning the resource basis) -Material (chemicals/reactions while questioning the resource basis) -Industrial -Societal	"Thus, five basic transitions are required towards a sustainable future. These transitions are substitution of non-renewable mineral and fossil resources by renewable resources, thorough dematerialization of industrial societies, sustainable basic production, equitable distribution of resources and fulfilment of elementary needs (VanWeenen, 1997)"	"Sanfte chemie" ("gentle chemistry" in German) is about making economic activities compatible with natural cycles and is distinct from green chemistry. "Duurzame Chemie" ("sustainable chemistry" in Dutch) is about fulfilling needs without the depletion of resources, without accumulation of pollutants in the environment and without deterioration of natural systems.
Smith et al.	Academia	Article	Overcoming diverse stakeholder definitions of sustainable chemistry through national leadership and cross-sector collaboration	2021	https://www.sciencedirect.com/science/article/pii/S2666086521001697	sustainable chemistry	This article is an assessment [based on GAO research] of the opportunities, challenges, and stakeholder roles in sustainable chemistry - a term that lacks agreement in its definition depending on the stakeholder. Interviews conducted identified that standard definitions and metrics for sustainability are important for stakeholders. A summary of national leadership and collaboration across many se…	Most important to least important: -Toxicity of the product -Toxicity of the required materials -Toxicity of the process waste -Greenhouse gas emissions -Amount of materials required -Energy use -Volume of process waste generated -Other air emissions -Water use -Recyclability of (or other uses for) process waste -Recyclability of the product -Percentage of renewable or biobased content -Land use/…	"The most common response GAO received [of 71 respondents], with 28 respondents agreeing, was that sustainable chemistry includes minimizing the use of non-renewable resources such as feedstocks. It is noteworthy that only 39% of stakeholders agreed with the most common response, highlighting that respondents do not agree on the definition of sustainable chemistry. The second most common response…	Implementing criteria vary across industries. For instance, atom economy, carbon efficiency, mass intensity, process mass efficiency, solvent intensity, and wastewater intensity are used to varying degrees. Some companies have developed their own chemical selection guides independent of others. Many companies use third-party certification tools, which focus on certain sustainability factors (prio…	"Most companies agreed that it would be somewhat or very useful to have a standard set of factors when assessing sustainability" (Table 2)
UBA	Govt	Report	Sustainable Chemistry: Positions and Criteria of the Federal Environment Agency	2009	https://www.umweltbundesamt.de/sites/default/files/medien/publikation/long/3798.pdf	sustainable chemistry, sustainable chemicals management, sustainable production, precautionary principle	An overview of sustainable chemistry from the German government perspective that defines the terms, provides principles, and describes activities of sustainable chemistry in the supply chain. Later, the document describes methods to introduce and propagate sustainable chemistry, including management systems and concepts.	"The general principles of sustainable chemistry [from a 2004 UBA workshop] include: Qualitative development: Use of harmless substances, or where this is impossible, substances involving a low risk for humans and the environment, and manufacturing of long-life products in a resource-saving manner; Quantitative development: Reduction of the consumption of natural resources, which should be renewa…	Sustainable chemistry is the "preventive protection of environment and health with an innovative economic strategy. This strategy has been designed to create high added-value jobs. At the same time, the competitiveness of the European chemical industries is to be maintained and improved."	There are 2 main fields in sustainable chemistry - areas related to sustainable production and processing as a field of activity: use of renewable resources, process optimization, and innovative technological approaches. Areas related to chemicals and products as a field of activity: REACH as a component of sustainable chemistry, dangerous chemicals and inherent chemical safety, and requirements …	N/A
UBA	Govt	Guide	Guide on Sustainable Chemicals: A decision tool for substance manufacturers, formulators and end users of chemicals	2016	https://www.umweltbundesamt.de/sites/default/files/medien/479/publikationen/161221_uba_fb_chemikalien_engl_bf.pdf	sustainable chemicals	"Numerous practical examples have been published on the implementation of single aspects of sustainability in enterprises. However, up to now guidance supporting enterprises in a systematic manner to practi-cally implement sustainable chemistry in their daily practice is missing. This guide assists the selection of sustainable chemi-cals by providing criteria to distinguish between sustainable an…	The 9 "golden rules" of sustainable chemicals (paraphrased): 1) If possible, use only substances which are not on lists of problematic substances, 2) for problematic substances used, assess the different uses and potential users of the substance throughout the lifecycle, 3) don't use dangerous substances (i.e. PBTs) to human health, 4) don't use substances that require a high level of risk manage…	"The sustainable use of (sustainable) chemicals aims at providing socially necessary products while minimizing resource consumption, reducing substance losses and controlling exposures by corporate, design oriented, organizational and technical means and at the same time enhancing healthy workplaces and fair social conditions."	Substance-specific criteria (section 2.1): 1. Mentioning in lists of “problematic substances”, 2. Dangerous physicochemical properties, 3. Human toxicity, 4. Problematic properties related to the environment, 5. Mobility, 6. Emission of greenhouse gases, 7. Resource consumption 8. Responsibility in the supply chain. The guide provides several tables of sub-criteria (ex PBT/vPvB) and their indicat…	The guide includes tables of "influencing factors" for each indicator. The guide also encourages the use of the SubSelect tool for the evaluation and comparison of substances and mixtures.
UBA	Govt	Report	Identification of Priority Topics in the Field of Sustainable Chemistry	2017	https://www.umweltbundesamt.de/sites/default/files/medien/1410/publikationen/2017-09-08_texte_83-2017_isc3_priority-topics_0.pdf	sustainable chemistry	"To enable the ISC3 a quick start in its substantive work, the customers (UBA/BMUB) have commissioned the drafting of three studies. The objective of this study was to identify to identify priority topics, i.e. technical solutions, concepts, business models etc., in the field of Sustainable Chemistry." Innovative solutions from 10 industries are assessed with a set of quantifiable indicators for …	This document notes that these are described in more detail in the Blum et al. UBA article defining sustainable chemistry from 2016.	A summary of the UBA definition submitted to Sustainable Chemistry and Pharmacy in a 2016 article: "Sustainable chemistry contributes to a positive, long-term development in society, environment and economy. With new approaches and technologies it develops value-creating products and services for the civil society needs. Sustainable chemistry increasingly uses substances, materials and processes …	The case studies highlight aspects of sustainable development "such as more efficient use of input materials, less waste, smaller carbon footprint as compared to conventional solutions., but verification is required. An in-depth analysis for each innovation remains to be done, but is beyond the scope of this study."	N/A
UBA	Govt	Report	Sustainability initiatives and approaches in the chemical sector	2017	https://www.umweltbundesamt.de/sites/default/files/medien/1410/publikationen/2017-09-08_texte_82-2017_isc3_initiatives-approches.pdf	sustainable chemistry	"The objective of this study was to create a knowledge base by mapping the most relevant initiatives/approaches in the field of sustainable chemistry."	N/A	"Industry has no uniform definition of sustainable chemistry. Some refer more or less clearly to the triple bottom line approach, another cites the OECD definition of sustainable chemistry, proposes an LCA approach and stresses the need for acceptance by society. The evaluation of the approach of six chemical companies – all global players – shows that only one (Dow Chemical) has a clear understa…	"The development of indicators for measuring progress in the chemical industry is an ongoing process. Current reports on the sustainability progress of companies or sectors focus mainly on economic, ecological and social aspects. WBCSD offers some guiding documents for environmental aspects in the chemical industry, and is frontrunner with its guideline of 2016 on social life cycle metrics (its d…	"Of the six chemical companies selected for analysis, five have published a Sustainability / CSR Report (or integrated report) in accordance with GRI 4 guidelines. The indicator concept, criteria and metrics for reporting is therefore predefined. Companies are however allowed to use additional metrics to control their sustainability goals and four of them did so."
UBA	Govt	Workshop	Anchoring sustainable chemistry in chemicals management: Development of milestones and indicators for international chemicals management beyond 2020	2021	N/A	sustainable chemistry	A series of 4 workshops over 2021 that included participants from industry, government, and the private sector to discuss the suitability of criteria for adequate indicators and to consider the current state of strategic objectives for SAICM and SMCW.	N/A	N/A	The general criteria for indicators of sustainable chemistry must be: -Specific -Established -Determinable -Measurable -Reliable -Future/progress-oriented -Relevant Specific sub-criteria for sustainable chemistry should include: -Sustainability -The precautionary principle -Systems thinking -Social responsibility -Transparency and collaboration -Resource management	N/A
UNEP	Inter-Govt	Report	Analysis of Stakeholder Submissions on Sustainable Chemistry Pursuant to UNEA Resolution 2/7	2019	https://wedocs.unep.org/handle/20.500.11822/31194	sustainable chemistry	This report is in response to the UN Resolution 2/7 and provides "a brief review of initiatives by stakeholders explicitly referring to sustainable chemistry identified through desk research, analyses stakeholder submissions made in response to Resolution 2/7, and summarizes results of a UN Environment Survey on the topic, administered in 2017 through collaboration of the Chemicals and Health Bra…	A large majority of respondents strongly agreed/agreed that sustainable chemistry encompass the following: -Identification and assessment of chemical and non-chemical alternatives for chemicals of concern -Traditional chemical management tools, such as chemical hazard assessment, risk assessment and riskmanagement -Advancing technology transfer for safe chemicals and non-chemical alternatives -Sc…	Stakeholder "respondends felt that an international definition of sustainable chemistry would be valuable...and supported a suggested option to frame it along the Brundlandt Commission’s definition of sustainable development"	N/A	The first point from the Summary Analysis (most relevant): "Stakeholders see sustainable chemistry as playing a key role in achieving the SDG Target 12.4 on the sound management of chemicals and wastes, including implementation of the Strategic Approach to International Chemicals Management and the chemicals and waste multilateral environmental agreements, and other related aspects of SDG 12 on s…
UNEP	Inter-Govt	Report	Green and Sustainable Chemistry: Framework Manual	2020	https://wedocs.unep.org/handle/20.500.11822/34338	Green and sustainable chemistry	"This Framework Manual on Green and Sustainable Chemistry has been developed pursuant to the mandate received from the United Nations Environment Assembly (UNEA) in 2019 through Resolution 4/8. Its main purpose is to facilitate a better understanding and provide guidance to countries and stakeholders relevant for advancing green and sustainable chemistry. The Manual will be supplemented with an E…	Guiding Considerations/Objectives: 1) Minimizing chemical hazards, 2) Avoiding regrettable substitutions and alternatives, 3) Sustainable sourcing of resources and feedstocks, 4) Advancing sustainability of production processes, 5) Advancing sustainability of products, 6) Minimizing chemical release and pollution, 7) Enabling non-toxic circularity, 8) Maximizing social benefits, 9) Protecting wor…	"Roadmap" elements: Risk reduction, Knowledge and evidence, Institutional capacity, and Leadership and coordination	Suggests general metrics that can be used, including: Hazard assessment and screening, E-factor, Process mass-intensity index, and Chemical footprint metrics. Highlights metrics reporting initiatives such as Chemie3 (Germany), Pollutant Release and Transfer Registries (PRTR), and ZDHC	The objectives are for all stakeholders in the value chain (some objectives are for specific ones) to "inspire actors to shift their chemistry innovations activities towards green and sustainable innovation".
van der Waals et al.	Working Group	Report	Safe by Design for Materials and Chemicals: Towards an Innovation Program in Horizon Europe	2019	N/A	safe-by-design	"This non-paper suggests the main topics for an innovation programme, in Horizon Europe or other European programmes, that could accelerate the design, development and adoption of safer alternatives to new and existing applications (materials, chemicals, products and services) where safety hazards (may) arise."	Specific areas of impact (from Executive Summary): -Human health -Ecosystems in Europe -Circular economy -Avoidance of future costs for business -Boosting innovation and competitive advantages -Increased policy coherence and efficiency Five essential elements of safe-by-design contribute to the aims (from Intro): -Functional approach -Minimizing toxicity -Full life-cycle perspective -Circular des…	"The concept of safe-by-design aims to prevent negative impacts on human health and the environment, by considering safety aspects early in the design process of chemicals, materials and products."	N/A	"While the starting point of safe-by-design is to minimise toxicity (including persistency and bio-accumulation, and including products of incomplete degradation/mineralization), it is clear that global challenges related to pollution, climate change and environmental degradation can only be tackledwith products that are sustainable in a wider sense, including aspects such as energy and resource …
Walmart	Industry	Webpage	Sustainable Chemistry Commitment	2021	https://corporate.walmart.com/policies	sustainable chemistry	A summary of Walmart's pledge to sustainable chemistry, including current policies and actions to encourage change.	"Walmart's Sustainable Chemistry Principles: We embrace the 12 Principles of Green Chemistry; We believe leadership is reasonably going above and beyond legal and regulatory compliance; We believe in the public disclosure of our goals and progress; We work with credible third party organizations and leverage regulatory and authoritative resources to guide our approach; We expect our products to m…	Relies on the OECD definition	"We will annually measure: -Percentage of formulated consumable products by UPC with fully disclosed formulation provided by supplier to The WERCS through WERCSmart -Percentage of suppliers reporting products with online ingredient disclosure through the Sustainability Index, a voluntary supplier survey -Percentage of suppliers reporting products with on-pack ingredient disclosure through the Sus…	"Walmart focuses its efforts in three key pillars: Transparency, Advancing Safer Formulation, and Advancing our Assortment."
