# Supplementary material for: An actionable definition and criteria for “sustainable chemistry” based on literature review and a global multisectoral stakeholder working group
Source: Royal Society of Chemistry journal article supplement (doi:10.1039/d3su00217a), 2023-01-01
Supplement: d3su00217a5.pdf [file d3su00217a5.pdf]

**Supplemental Table S3.** Timeline and content for the ECOSChem full-committee meetings throughout 2022.

| <b>Committee Meeting</b> | <b>Theme and Content</b>                                                                                                                                                                            |
|--------------------------|-----------------------------------------------------------------------------------------------------------------------------------------------------------------------------------------------------|
| March 15, 2022           | <ul style="list-style-type: none"><li>• Project goals, plan, and timeline</li><li>• Discuss the subcommittees needed</li><li>• Review the draft vision statement</li></ul>                          |
| May 17, 2022             | <ul style="list-style-type: none"><li>• Review the revised vision statement</li><li>• Review draft principles</li><li>• Discuss the landscape review and thematic analysis of definitions</li></ul> |
| July 13, 2022            | <ul style="list-style-type: none"><li>• Finalize the vision and principles (for internal use)</li><li>• Review draft definitions</li><li>• Discuss stakeholder engagement</li></ul>                 |
| September 29, 2022       | <ul style="list-style-type: none"><li>• Review a revised definition in the context of draft criteria</li><li>• Finalize external engagement plan</li><li>• Discuss outreach strategies</li></ul>    |
| December 1, 2022         | <ul style="list-style-type: none"><li>• Review external feedback</li><li>• Finalize the definition and criteria</li><li>• Review the preamble</li><li>• Finalize outreach strategies</li></ul>      |
